# Supplementary material for: Coordinated human sleeping brainwaves map peripheral body glucose homeostasis
Source: PubMed Central journal article supplement (PMC10394167; doi:10.1016/j.xcrm.2023.101100), 2023-07-07

**Cell Reports Medicine, Volume 4**

**Supplemental information**

**Coordinated human sleeping brainwaves  
map peripheral body glucose homeostasis**

**Raphael Vallat, Vyoma D. Shah, and Matthew P. Walker**

## Supplementary Tables

**Table S1. Demographics of the Cleveland Family Study (CFS; visit 5).** Related to STAR Methods.

| Variables                                  | Statistics                             |
|--------------------------------------------|----------------------------------------|
| No. unique participants                    | 647                                    |
| No. unique families                        | 144                                    |
| Age (yrs)                                  | 44.73 ± 17.39 (range = 15-89)          |
| Sex                                        | 359 F / 288 M                          |
| BMI (kg/m <sup>2</sup> )                   | 33.47 ± 9.17 (range = 17-85)           |
| Race/ethnicity                             | 350 African / 280 Caucasian / 17 Other |
| Smoking status                             | 324 No / 169 Yes / 154 Missing         |
| Hypertension status                        | 428 No / 211 Yes                       |
| Diabetes status                            | 530 No / 115 Yes                       |
| Fasting glucose (mg/dl)                    | 100.56 ± 25.65 (range = 66-246)        |
| log(HOMA-IR)                               | 0.99 ± 0.77 (range = -1-4)             |
| log(HOMA-B)                                | 4.81 ± 0.63 (range = 3-8)              |
| Apnea-hypopnea index (AHI)                 | 13.78 ± 20.17 (range = 0-125)          |
| % of participants with AHI >30             | 13.6%                                  |
| Sleep efficiency (SE, %)                   | 81.18 ± 12.74 (range = 27-99)          |
| Sleep period time (SPT, min)               | 459.13 ± 82.01 (range = 52-660)        |
| Total sleep time (TST, min)                | 369.83 ± 74.26 (range = 40-576)        |
| N1 (% of TST)                              | 5.32 ± 4.72 (range = 0-63)             |
| N2 (% of TST)                              | 58.55 ± 12.41 (range = 21-100)         |
| N3 (% of TST)                              | 17.71 ± 10.99 (range = 0-57)           |
| REM (% of TST)                             | 18.41 ± 7.61 (range = 0-44)            |
| SO density (per min of NREM)               | 2.50 ± 1.98 (range = 0-11)             |
| Spindles density (per min of NREM)         | 3.28 ± 1.37 (range = 0-7)              |
| Proportion of SO with significant coupling | 87.60 ± 3.35 (range = 72-100)          |
| SO—spindle coupling strength               | 0.32 ± 0.02 (range = 0.25-0.39)        |
| SO—spindle preferred phase (°)             | -12.15 ± 28.32                         |

SO = slow oscillations.

**Table S2. Slow oscillation—spindle coupling quantity significantly predicts next-day fasting blood glucose in the CFS dataset.** Related to Figure 2.

| Predictors                                      | $\beta$ | Standardized $\beta$ | 95% CI        | p                |
|-------------------------------------------------|---------|----------------------|---------------|------------------|
| Proportion of NREM SO with significant coupling | -3.88   | -0.12                | -6.16 – -1.60 | <b>0.001</b>     |
| Age                                             | 0.01    | 0.15                 | 0.00 – 0.01   | <b>&lt;0.001</b> |
| Male                                            | 0.41    | 0.19                 | 0.26 – 0.57   | <b>&lt;0.001</b> |
| Race/ethnicity [Black]                          | 0.15    | 0.14                 | -0.04 – 0.34  | 0.128            |
| Race/ethnicity [Other]                          | 0.18    | 0.16                 | -0.34 – 0.69  | 0.502            |
| BMI                                             | 0.03    | 0.28                 | 0.02 – 0.04   | <b>&lt;0.001</b> |
| Hypertension                                    | 0.44    | 0.19                 | 0.25 – 0.62   | <b>&lt;0.001</b> |
| Apnea-hypopnea index (AHI)                      | -0.00   | -0.06                | -0.01 – 0.00  | 0.158            |
| Sleep efficiency                                | -0.01   | -0.07                | -0.01 – 0.00  | 0.105            |
| Sleep period time                               | -0.01   | -0.02                | -0.07 – 0.05  | 0.686            |

The number of participants with complete data included in the multilevel regression analysis was 623. Family ID was set as a random effect (n=144 unique groups). The dependent variable, fasting blood glucose, was transformed using a square root transformation to reduce skewness. The reference category for race/ethnicity was White. Age, sex, BMI, and hypertension were all significant predictors of fasting blood glucose levels. Being a male, older, having a higher BMI, and having hypertension were all associated with higher levels of next-day fasting blood glucose. Race, sleep duration, sleep efficiency, and AHI were not significant predictors of next-day fasting blood glucose.

**Table S3. Slow oscillation—spindle coupling strength significantly predicts next-day fasting blood glucose in the CFS dataset.** Related to Figure 2.

| Predictors                   | $\beta$ | Standardized $\beta$ | 95% CI        | p                |
|------------------------------|---------|----------------------|---------------|------------------|
| SO—spindle coupling strength | -4.90   | -0.08                | -9.04 – -0.77 | <b>0.020</b>     |
| Age                          | 0.01    | 0.16                 | 0.00 – 0.02   | <b>&lt;0.001</b> |
| Male                         | 0.41    | 0.18                 | 0.25 – 0.56   | <b>&lt;0.001</b> |
| Race/ethnicity [Black]       | 0.16    | 0.15                 | -0.03 – 0.35  | 0.102            |
| Race/ethnicity [Other]       | 0.18    | 0.16                 | -0.34 – 0.69  | 0.502            |
| BMI                          | 0.03    | 0.29                 | 0.03 – 0.04   | <b>&lt;0.001</b> |
| Hypertension                 | 0.44    | 0.19                 | 0.25 – 0.62   | <b>&lt;0.001</b> |
| Apnea-hypopnea index (AHI)   | -0.00   | -0.05                | -0.01 – 0.00  | 0.164            |
| Sleep efficiency             | -0.00   | -0.05                | -0.01 – 0.00  | 0.198            |
| Sleep period time            | -0.01   | -0.01                | -0.07 – 0.05  | 0.746            |

The number of participants with complete data included in the multilevel regression analysis was 623. Family ID was set as a random effect (n=144 unique groups). The dependent variable, fasting blood glucose, was transformed using a square root transformation to reduce skewness. The reference category for race/ethnicity was White. Age, sex, BMI, and hypertension were all significant predictors of fasting glucose levels. Being a male, older, having a higher BMI, and having hypertension were all associated with higher levels of next-day fasting blood glucose. Race, sleep duration, sleep efficiency, and AHI were not significant predictors of next-day fasting blood glucose.

**Table S4. Demographics of the MESA sleep study. Related to STAR Methods.**

| <b>Variables</b>                            | <b>Statistics</b>                                       |
|---------------------------------------------|---------------------------------------------------------|
| No. unique participants                     | 1996                                                    |
| Age (yrs)                                   | 68.43 ± 9.17 (range = 54-93)                            |
| Sex                                         | 359 F / 288 M                                           |
| BMI (kg/m <sup>2</sup> )                    | 28.64 ± 5.49 (range = 17-56)                            |
| Race/ethnicity                              | 729 Caucasian / 550 African / 478 Hispanic / 239 Asian  |
| Smoking status                              | 930 Never / 912 Former / 142 Current                    |
| Gap between PSG and glucose Measures (days) | 341 ± 200 (range = 0-1024)                              |
| Hypertension status                         | 1130 Yes / 866 No                                       |
| Diabetes status                             | 1197 Normal / 409 Impaired / 356 Treated / 34 Untreated |
| Fasting glucose (mg/dl)                     | 100.46 ± 21.81 (range = 62-249)                         |
| log(HOMA-IR)                                | 0.99 ± 0.77 (range = -1-4)                              |
| log(HOMA-B)                                 | 4.81 ± 0.63 (range = 3-8)                               |
| Apnea-hypopnea index (AHI)                  | 19.73 ± 18.54 (range = 0-111)                           |
| % of participants with AHI >30              | 21.8%                                                   |
| Sleep efficiency (SE, %)                    | 78.53 ± 13.44 (range = 10-99)                           |
| Sleep period time (SPT, min)                | 462.20 ± 91.48 (range = 94-1084)                        |
| Total sleep time (TST, min)                 | 359.89 ± 82.15 (range = 32-601)                         |
| N1 (% of TST)                               | 14.18 ± 9.16 (range = 0-79)                             |
| N2 (% of TST)                               | 58.00 ± 11.05 (range = 19-100)                          |
| N3 (% of TST)                               | 9.98 ± 9.05 (range = 0-51)                              |
| REM (% of TST)                              | 17.84 ± 6.92 (range = 0-59)                             |
| SO density (per min of NREM)                | 1.48 ± 1.18 (range = 0-13)                              |
| Spindles density (per min of NREM)          | 2.68 ± 1.43 (range = 0-12)                              |
| Proportion of SO with significant coupling  | 86.34 ± 4.44 (range = 67-100)                           |
| SO—spindle coupling strength                | 0.32 ± 0.02 (range = 0.23-0.41)                         |
| SO—spindle preferred phase (°)              | -12.15 ± 28.32                                          |

SO = slow oscillations.

**Table S5. Slow oscillation—spindle coupling quantity significantly predicts next-day fasting blood glucose in the MESA dataset.** Related to Figure 3.

| Predictors                                      | $\beta$ | Standardized $\beta$ | 95% CI        | p                |
|-------------------------------------------------|---------|----------------------|---------------|------------------|
| Proportion of NREM SO with significant coupling | -1.04   | -0.05                | -2.00 – -0.08 | <b>0.034</b>     |
| Age                                             | 0.00    | 0.02                 | -0.00 – 0.01  | 0.390            |
| Male                                            | 0.22    | 0.11                 | 0.13 – 0.30   | <b>&lt;0.001</b> |
| Race/ethnicity [Black]                          | 0.02    | 0.02                 | -0.09 – 0.13  | 0.688            |
| Race/ethnicity [Asian]                          | 0.37    | 0.38                 | 0.23 – 0.51   | <b>&lt;0.001</b> |
| Race/ethnicity [Hispanic]                       | 0.36    | 0.37                 | 0.25 – 0.47   | <b>&lt;0.001</b> |
| BMI                                             | 0.04    | 0.20                 | 0.03 – 0.04   | <b>&lt;0.001</b> |
| Hypertension                                    | 0.23    | 0.12                 | 0.14 – 0.32   | <b>&lt;0.001</b> |
| Apnea-hypopnea index (AHI)                      | 0.00    | 0.03                 | -0.00 – 0.00  | 0.201            |
| Sleep efficiency                                | 0.00    | 0.01                 | -0.00 – 0.00  | 0.698            |
| Sleep period time                               | -0.00   | -0.02                | -0.00 – 0.00  | 0.380            |

The number of participants with complete data included in the multilevel regression analysis was 1966. The dependent variable, fasting blood glucose, was transformed using a square root transformation to reduce skewness. The reference category for race/ethnicity was White. Sex, race BMI, and hypertension were all significant predictors of fasting blood glucose levels. Being male, being Asian, being Hispanic, having a higher BMI, and having hypertension were all associated with higher levels of next-day fasting blood glucose. Age, sleep duration, sleep efficiency, and AHI were not significant predictors of fasting blood glucose.

**Table S6. Slow oscillation—spindle coupling strength significantly predicts next-day fasting blood glucose in the MESA dataset.** Related to Figure 3.

| Predictors                                      | $\beta$ | Standardized $\beta$ | 95% CI        | p                |
|-------------------------------------------------|---------|----------------------|---------------|------------------|
| Proportion of NREM SO with significant coupling | -2.57   | -0.06                | -4.56 – -0.59 | <b>0.011</b>     |
| Age                                             | 0.00    | 0.02                 | -0.00 – 0.01  | 0.464            |
| Male                                            | 0.22    | 0.11                 | 0.13 – 0.30   | <b>&lt;0.001</b> |
| Race/ethnicity [Black]                          | 0.02    | 0.02                 | -0.09 – 0.13  | 0.710            |
| Race/ethnicity [Asian]                          | 0.37    | 0.38                 | 0.23 – 0.51   | <b>&lt;0.001</b> |
| Race/ethnicity [Hispanic]                       | 0.36    | 0.37                 | 0.25 – 0.47   | <b>&lt;0.001</b> |
| BMI                                             | 0.03    | 0.19                 | 0.03 – 0.04   | <b>&lt;0.001</b> |
| Hypertension                                    | 0.23    | 0.12                 | 0.14 – 0.32   | <b>&lt;0.001</b> |
| Apnea-hypopnea index (AHI)                      | 0.00    | 0.03                 | -0.00 – 0.00  | 0.210            |
| Sleep efficiency                                | 0.00    | 0.01                 | -0.00 – 0.00  | 0.691            |
| Sleep period time                               | -0.00   | -0.02                | -0.00 – 0.00  | 0.387            |

The number of participants with complete data included in the multilevel regression analysis was 1966. The dependent variable, fasting blood glucose, was transformed using a square root transformation to reduce skewness. The reference category for race/ethnicity was White. Sex, race BMI, and hypertension were all significant predictors of fasting blood glucose levels. Being male, being Asian, being Hispanic, having a higher BMI, and having hypertension were all associated with higher levels of next-day fasting blood glucose. Age, sleep duration, sleep efficiency, and AHI were not significant predictors of fasting blood glucose.

**Table S7. Slow oscillation—spindle coupling quantity significantly predicts next-day HOMA-IR in the CFS dataset.** Related to Figure 4.

| Predictors                                      | $\beta$ | Standardized $\beta$ | 95% CI        | p                |
|-------------------------------------------------|---------|----------------------|---------------|------------------|
| Proportion of NREM SO with significant coupling | -2.20   | -0.10                | -3.73 – -0.68 | <b>0.005</b>     |
| Age                                             | -0.0    | 0.02                 | -0.00 – 0.00  | 0.660            |
| Male                                            | 0.17    | 0.11                 | 0.07 – 0.27   | <b>0.001</b>     |
| Race/ethnicity [Black]                          | 0.14    | 0.19                 | 0.02 – 0.27   | <b>0.025</b>     |
| Race/ethnicity [Other]                          | 0.13    | 0.17                 | -0.21 – 0.47  | 0.458            |
| BMI                                             | 0.04    | 0.44                 | 0.03 – 0.04   | <b>&lt;0.001</b> |
| Hypertension                                    | 0.23    | 0.14                 | 0.11 – 0.35   | <b>&lt;0.001</b> |
| Apnea-hypopnea index (AHI)                      | 0.00    | 0.01                 | -0.00 – 0.00  | 0.826            |
| Sleep efficiency                                | -0.00   | -0.01                | -0.01 – 0.00  | 0.797            |
| Sleep period time                               | -0.03   | -0.05                | -0.07 – -0.01 | <b>0.141</b>     |

The number of participants with complete data included in the multilevel regression analysis was 626. Family ID was set as a random effect (n=144 unique groups). The dependent variable, HOMA-IR, was log-transformed to reduce skewness. The reference category for race/ethnicity was White.



**Table S8. Slow oscillation—spindle coupling strength significantly predicts next-day HOMA-IR in the CFS dataset.** Related to Figure 4.

| Predictors                   | $\beta$ | Standardized $\beta$ | 95% CI        | p                |
|------------------------------|---------|----------------------|---------------|------------------|
| SO—spindle coupling strength | -3.39   | -0.08                | -6.14 – -0.64 | <b>0.016</b>     |
| Age                          | 0.00    | 0.02                 | -0.00 – 0.00  | 0.580            |
| Male                         | 0.17    | 0.11                 | 0.06 – 0.27   | <b>0.002</b>     |
| Race/ethnicity [Black]       | 0.15    | 0.19                 | 0.03 – 0.27   | <b>0.018</b>     |
| Race/ethnicity [Other]       | 0.14    | 0.18                 | -0.20 – 0.48  | 0.428The         |
| BMI                          | 0.04    | 0.44                 | 0.03 – 0.04   | <b>&lt;0.001</b> |
| Hypertension                 | 0.23    | 0.14                 | 0.11 – 0.35   | <b>&lt;0.001</b> |
| Apnea-hypopnea index (AHI)   | 0.00    | 0.01                 | -0.00 – 0.00  | 0.829            |
| Sleep efficiency             | 0.00    | 0.00                 | -0.00 – 0.00  | 0.973            |
| Sleep period time            | -0.03   | -0.05                | -0.07 – -0.01 | <b>0.170</b>     |

The number of participants with complete data included in the multilevel regression analysis was 626. Family ID was set as a random effect (n=144 unique groups). The dependent variable, HOMA-IR, was log-transformed to reduce skewness. The reference category for race/ethnicity was White.

**Table S9. Multilevel regression between sleep features and next-day fasting blood glucose in the CFS dataset.**  
Related to Figure 5.

| <b>Sleep predictors</b>      | <b>Std. beta</b> | <b>n</b> | <b>p</b>     |
|------------------------------|------------------|----------|--------------|
| Proportion of coupled SO     | -0.109           | 639      | <b>0.002</b> |
| REM alpha                    | <b>0.097</b>     | 626      | <b>0.01</b>  |
| NREM theta                   | -0.088           | 647      | <b>0.013</b> |
| SO–spindle coupling strength | -0.079           | 639      | <b>0.026</b> |
| REM delta                    | -0.059           | 626      | 0.107        |
| NREM delta (SWA)             | 0.058            | 647      | 0.1          |
| N1                           | -0.057           | 647      | 0.11         |
| REM sigma                    | 0.056            | 626      | 0.161        |
| NREM slow delta              | 0.056            | 647      | 0.11         |
| TIB                          | -0.055           | 647      | 0.112        |
| SO density                   | 0.055            | 647      | 0.23         |
| Arousal index                | -0.049           | 640      | 0.197        |
| REM theta                    | 0.049            | 626      | 0.171        |
| %N1                          | -0.047           | 647      | 0.2          |
| SME                          | -0.047           | 647      | 0.231        |
| REM fast delta               | -0.046           | 626      | 0.233        |
| N2 latency                   | -0.044           | 647      | 0.214        |
| NREM alpha                   | -0.041           | 647      | 0.245        |
| REM slow delta               | -0.039           | 626      | 0.266        |
| SOL                          | -0.039           | 647      | 0.274        |
| WASO                         | 0.037            | 647      | 0.333        |
| NREM                         | -0.034           | 647      | 0.354        |
| Spindles frequency           | -0.033           | 647      | 0.346        |
| N2                           | -0.033           | 647      | 0.349        |
| N3 latency                   | 0.032            | 617      | 0.37         |
| TST                          | -0.032           | 647      | 0.392        |
| N3                           | 0.029            | 647      | 0.483        |
| N1 latency                   | -0.028           | 640      | 0.438        |
| %N3                          | 0.027            | 647      | 0.502        |
| AHI                          | -0.027           | 647      | 0.491        |
| SO frequency                 | -0.021           | 647      | 0.601        |
| NREM beta                    | -0.02            | 647      | 0.56         |
| SO amplitude                 | -0.02            | 647      | 0.664        |
| NREM power                   | 0.019            | 647      | 0.58         |
| %REM                         | 0.017            | 647      | 0.614        |
| %NREM                        | -0.017           | 647      | 0.616        |
| %N2                          | -0.015           | 647      | 0.696        |
| Spindles power               | 0.013            | 647      | 0.736        |

|                  |        |     |       |
|------------------|--------|-----|-------|
| REM power        | -0.013 | 626 | 0.718 |
| NREM fast delta  | -0.011 | 647 | 0.75  |
| REM              | -0.008 | 647 | 0.823 |
| REM beta         | -0.007 | 626 | 0.851 |
| SE               | -0.007 | 647 | 0.86  |
| REM latency      | 0.004  | 626 | 0.918 |
| Spindles density | -0.004 | 647 | 0.921 |
| NREM sigma       | -0.003 | 647 | 0.927 |
| SPT              | 0.001  | 647 | 0.988 |

---

All regressions were adjusted for age, sex, BMI, race/ethnicity, hypertension and family ID. Regressions are sorted in descending order of significance. NREM refers to N2 + N3 sleep (N1 excluded). Sleep features that significantly predict *higher* levels of fasting glucose = worse outcome) are highlighted in red. A total of 47 sleep parameters were included in the correlation analysis. Two-sided p-values were not corrected for multiple comparisons. The spectral frequency bands are: slow delta (0.5-1.25 Hz), fast delta (1.25-4 Hz), delta (0.5-4 Hz), theta (4-8 Hz), alpha (8-12 Hz), sigma (12-16 Hz), beta (16-30 Hz), and total power (in microvolts-squared, 0.5-30 Hz). AHI = Apnea-hypopnea index, SE = sleep efficiency, SO = slow oscillations, SME = sleep maintenance efficiency, SOL = sleep onset latency, SPT = sleep period time, TST = total sleep time, WASO = wake after sleep onset.

**Table S10. Multilevel regression between sleep features and next-day insulin resistance (HOMA-IR) in the CFS dataset.** Related to Figure 5.

| <b>Sleep predictors</b>      | <b>Std. beta</b> | <b>n</b> | <b>p</b>     |
|------------------------------|------------------|----------|--------------|
| SO density                   | <b>0.11</b>      | 647      | <b>0.012</b> |
| Proportion of coupled SO     | -0.096           | 639      | <b>0.004</b> |
| SO–spindle coupling strength | -0.084           | 639      | <b>0.014</b> |
| REM alpha                    | <b>0.083</b>     | 626      | <b>0.022</b> |
| NREM fast delta              | -0.081           | 647      | <b>0.017</b> |
| NREM slow delta              | <b>0.079</b>     | 647      | <b>0.019</b> |
| Spindles density             | -0.072           | 647      | <b>0.039</b> |
| NREM theta                   | -0.072           | 647      | <b>0.035</b> |
| REM theta                    | <b>0.068</b>     | 626      | <b>0.047</b> |
| SO amplitude                 | 0.067            | 647      | 0.124        |
| REM delta                    | -0.059           | 626      | 0.099        |
| %N1                          | -0.059           | 647      | 0.095        |
| N1                           | -0.058           | 647      | 0.095        |
| %N3                          | 0.056            | 647      | 0.145        |
| SPT                          | -0.052           | 647      | 0.123        |
| REM                          | -0.05            | 647      | 0.147        |
| REM fast delta               | -0.05            | 626      | 0.178        |
| TST                          | -0.049           | 647      | 0.182        |
| SOL                          | 0.047            | 647      | 0.175        |
| N3                           | 0.045            | 647      | 0.256        |
| SO frequency                 | -0.041           | 647      | 0.297        |
| NREM delta (SWA)             | 0.039            | 647      | 0.252        |
| NREM power                   | 0.039            | 647      | 0.246        |
| N3 latency                   | 0.039            | 617      | 0.274        |
| REM slow delta               | -0.037           | 626      | 0.285        |
| N1 latency                   | 0.036            | 640      | 0.297        |
| N2                           | -0.036           | 647      | 0.292        |
| REM latency                  | 0.035            | 626      | 0.314        |
| SE                           | -0.033           | 647      | 0.356        |
| NREM                         | -0.028           | 647      | 0.436        |
| N2 latency                   | 0.027            | 647      | 0.427        |
| NREM beta                    | -0.022           | 647      | 0.511        |
| AHI                          | 0.022            | 647      | 0.561        |
| Spindles frequency           | -0.022           | 647      | 0.526        |
| SME                          | 0.021            | 647      | 0.571        |
| WASO                         | -0.02            | 647      | 0.583        |
| REM sigma                    | 0.02             | 626      | 0.605        |
| REM power                    | 0.017            | 626      | 0.615        |

|                |        |     |       |
|----------------|--------|-----|-------|
| TIB            | -0.017 | 647 | 0.616 |
| NREM alpha     | -0.014 | 647 | 0.677 |
| %NREM          | 0.013  | 647 | 0.703 |
| %REM           | -0.013 | 647 | 0.706 |
| Spindles power | 0.012  | 647 | 0.738 |
| %N2            | -0.011 | 647 | 0.752 |
| REM beta       | -0.008 | 626 | 0.812 |
| NREM sigma     | 0.004  | 647 | 0.9   |
| Arousal index  | -0.001 | 640 | 0.978 |

---

All regressions were adjusted for age, sex, BMI, race/ethnicity, hypertension and family ID. Regressions are sorted in descending order of significance. NREM refers to N2 + N3 sleep (N1 excluded). Sleep features that significantly predict *higher* HOMA-IR values (= worse outcome) are highlighted in red. A total of 47 sleep parameters were included in the correlation analysis. Two-sided p-values were not corrected for multiple comparisons. The spectral frequency bands are: slow delta (0.5-1.25 Hz), fast delta (1.25-4 Hz), delta (0.5-4 Hz), theta (4-8 Hz), alpha (8-12 Hz), sigma (12-16 Hz), beta (16-30 Hz), and total power (in microvolts-squared, 0.5-30 Hz). AHI = Apnea-hypopnea index, SE = sleep efficiency, SO = slow oscillations, SME = sleep maintenance efficiency, SOL = sleep onset latency, SPT = sleep period time, TST = total sleep time, WASO = wake after sleep onset.

Supplementary Figures

Figure S1. Assessment of insulin resistance (IR) and pancreatic beta cells function (B) using the standardized homeostasis assessment model (HOMA). A) HOMA-IR is positively correlated with fasting glucose. B) HOMA-B is negatively correlated with fasting glucose. Related to STAR Methods.

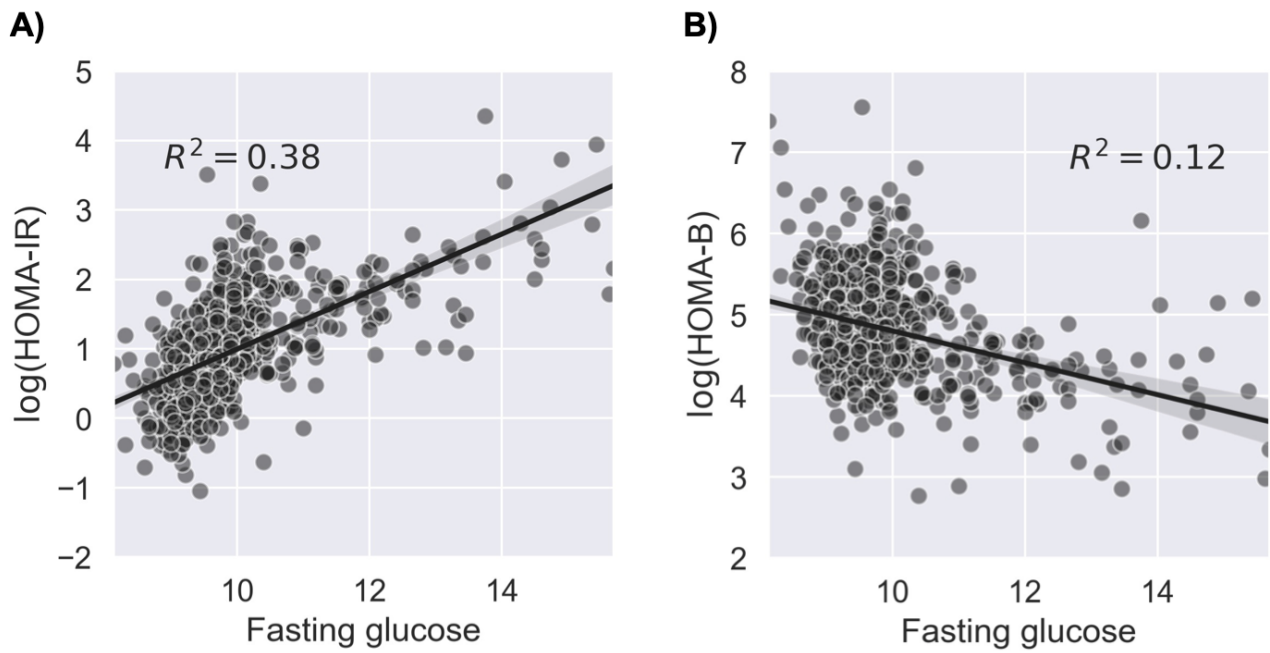

**Figure S2. Mediation analysis demonstrated that the link between SO-spindle coupling and improved next-day fasting glucose is, in part, explained by increased heart rate variability, in the MESA dataset.** A) A significant association between the proportion of SO-spindle coupling and increased heart rate variability (HRV), which in turn predicted lower (improved) fasting glucose values. B) A significant association between the strength of SO-spindle coupling and increased HRV, which in turn predicted lower (improved) fasting glucose values. Related to Figure 3.

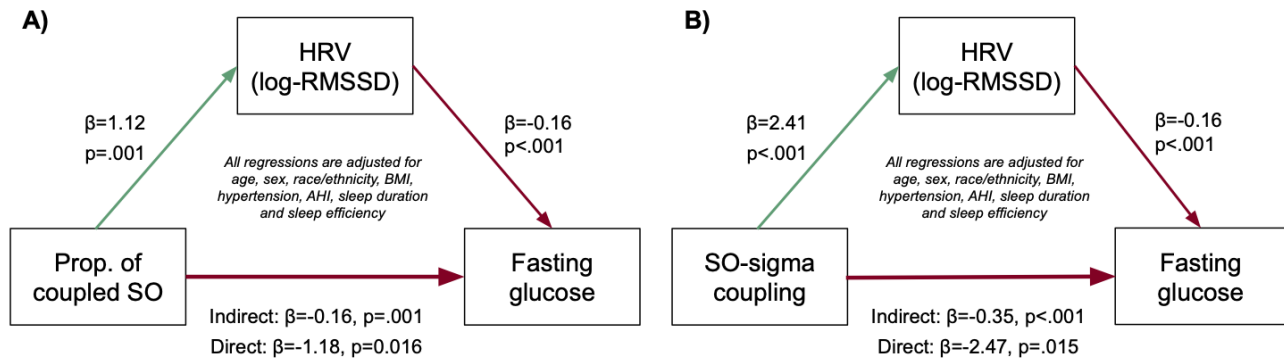

**Figure S3. Mediation analysis demonstrated that the link between SO-spindle coupling and improved next-day fasting glucose is not, in part, explained by increased heart rate variability, in the CFS dataset.** A) A significant association between the proportion of SO-spindle coupling and lower (improved) fasting glucose values is not mediated by HRV. B) A significant association between the strength of SO-spindle coupling and lower (improved) fasting glucose values is not mediated by HRV. Related to Figure 2.

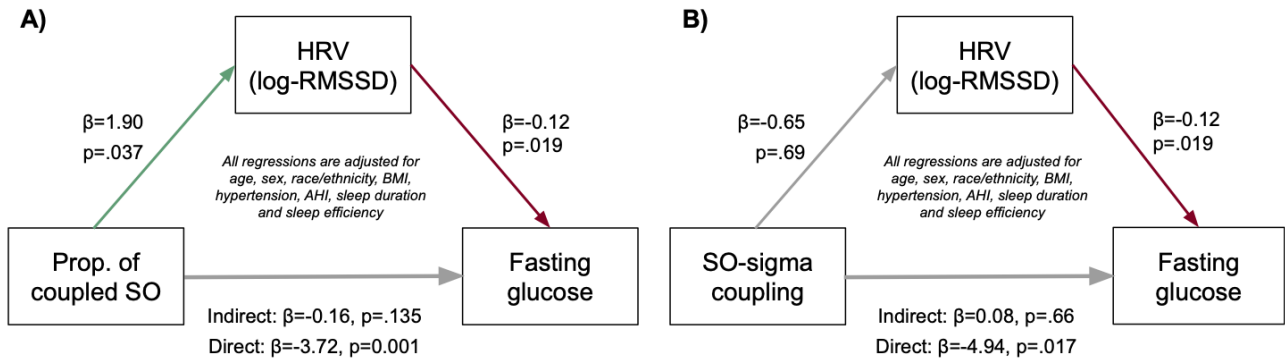



**Figure S4. Mediation analysis demonstrated that the link between SO-spindle coupling and next-day insulin resistance is modestly explained by increased heart rate variability, in the CFS dataset.** A) A trending significant association between the proportion of SO-spindle coupling increased heart rate variability (HRV), which in turn predicted lower (better) insulin resistance values. B) A significant association between the strength of SO-spindle coupling and lower (better) insulin resistance values is not mediated by HRV. Related to Figure 2.

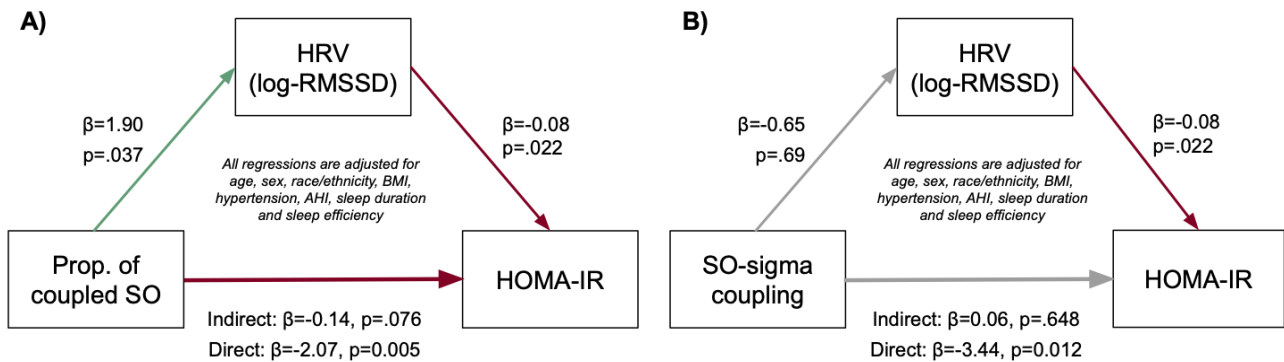

Supplement: mmc1.pdf [file mmc1.pdf]
